# Supplementary material
Source: PubMed Central journal article supplement (PMC8761592)

1 **Supplementary Files**

2 **Supplementary Methods**

3 **Gel Permeation Chromatography**

4 The purified sample (1 mg) was dissolved in 1 ml dimethylformamide (DMF) containing 50 mM  
5 lithium chloride (LiCl). Then, 200  $\mu$ l of the sample was subjected to gel permeation  
6 chromatography (GPC). The molecular mass was estimated using a high-performance liquid  
7 chromatograph equipped with a ultraviolet (UV) detector (2489 UV/visible detector; Nihon-  
8 Waters, Tokyo, Japan) directly connected to a TSK gel  $\alpha$ -3000 column (7.8 mm  $\times$  30 cm;  
9 TOSOH, Tokyo, Japan). DMF containing 50 mM LiCl was used as the solvent at a flow rate of  
10 0.7 ml/min, and the column temperature was maintained at 40  $^{\circ}$ C. The peak top of the eluted  
11 sample was used for molecular mass determination, with a calibration curve obtained using  
12 standard polystyrene kits (PSt Quick E and F; TOSOH, Tokyo, Japan).

13

14 **Antiviral Assay**

15 The proanthocyanidin (PAC) solution or distilled water (the control) was sprayed onto the leaves  
16 of *Nicotiana benthamiana* plants in the third true leaf stage. The pTL-derived plasmids  
17 (pTLBN.G3), containing a full-length ToMV cDNA and a gene encoding green fluorescent  
18 protein (GFP) (Kubota et al. 2003), were used as a template for *in vitro* transcription using the  
19 AmpliCap-Max T7 High Yield Message Maker Kit (CELLSCRIPT, Madison, WI, USA). Three  
20 days after the treatment, the third true leaves of *N. benthamiana* were mechanically inoculated  
21 with 20  $\mu$ l of 40-fold dilution of the transcription mixture. The antiviral activity was assessed  
22 based on the number of GFP foci formed on the treated *N. benthamiana* leaves compared with  
23 those on the control. The number of GFP foci formed on the inoculated leaves was calculated  
24 under blue light irradiation at 3 days post-inoculation. Lastly, the protective value was calculated  
25 as  $(1 - \text{number of GFP spots formed on treated plants} / \text{number of GFP spots formed on}$   
26  $\text{untreated plants}) \times 100$ .

27

### 28 **Cytopathic Effect (CPE) Assay for Influenza A Virus**

29 During the CPE assay for influenza A virus, Madin–Darby canine kidney (MDCK) cells were  
30 grown in high-glucose DMEM with L-glutamine and phenol red (Fujifilm Wako Pure Chemical,  
31 Japan) supplemented with 10% HyClone fetal bovine serum (FBS) (GE Healthcare, Japan) and  
32 0.05 mg/ml kanamycin sulfate (Fujifilm Wako) in 96-well plates for 24 h at 36 °C under 5% CO<sub>2</sub>.  
33 First, the PACs were added to pure water to prepare 0.1 to 1 mg/ml solutions. Then, 900 µl of  
34 each test solution and 100 µl of influenza A virus (H1N1 A/PR/8/34) preparation were mixed for  
35 10–30 min. Next, 10× dilutions were prepared by adding the cell culture medium (DMEM with  
36 1% FBS and 0.05 mg/ml kanamycin sulfate) and 100 µl of the diluted mixture into each well of a  
37 96-well culture plate seeded with virus-susceptible cells. The cells were further incubated for 4  
38 to 7 days at 36°C under 5% CO<sub>2</sub>, and CPE was observed under an inverted microscope. The 50%  
39 endpoint dilution (TCID<sub>50</sub>/ml) was calculated by the Reed and Muench (1938) method.

40

### 41 **Cytopathic Effect (CPE) Assay for Porcine Epidemic Diarrhea Virus (PEDV)**

42 During the CPE assay for PEDV, Vero cells were grown in minimum essential medium (MEM)  
43 for 5 days at 37°C under 5% CO<sub>2</sub>. Proanthocyanidins from *Alpinia zerumbet* (AzPACs) were  
44 added to pure water to obtain concentrations of 0.1–0.5 mg/ml. Then, 900 µl of each test solution  
45 and 100 µl of each PEDV preparation were mixed for 30 min. After mixing, 10× dilutions were  
46 prepared by adding MEM and 100 µl of the diluted mixture into each well of 96-well culture  
47 plate in which virus-susceptible cells were sheeted. The cells were further incubated for 5 days at  
48 37°C under 5% CO<sub>2</sub>, and the CPE was observed under an inverted microscope. The 50%  
49 endpoint dilution (TCID<sub>50</sub>/ml) was calculated by the Reed and Muench (1938) method.

50

### 51 **Statistical Analysis**

52 The differences between the control and treated plants at each leaf position were analyzed using  
53 one-way analysis of variance with Dunnett's multiple comparisons test. The differences with a *p*-  
54 value of <0.01 were considered statistically significant.

55 The differences in protective values between treated plants were analyzed using one-way  
56 analysis of variance with Tukey–Kramer multiple comparisons test. Differences with a *p*-value  
57 of <0.05 were considered statistically significant.

58

### 59 **Supplementary Figure**

60 Supplementary Figure S1. The molecular mass distribution of proanthocyanidins from *Alpinia*  
61 *zerumbet* (AzPAC), apple (ApPAC), and green tea (GtPAC). The purified sample (1 mg) was  
62 dissolved in 1 ml dimethylformamide (DMF) containing 50 mM lithium chloride (LiCl), and 200  
63  $\mu$ l of the sample was subjected to gel permeation chromatography (GPC). The molecular mass  
64 was estimated using a high-performance liquid chromatograph equipped with a UV detector  
65 (2489 UV/visible detector; Nihon-Waters, Tokyo, Japan) and a TSK gel  $\alpha$ -3000 column (7.8 mm  
66  $\times$  30 cm; TOSOH, Tokyo, Japan), which were connected directly. DMF containing 50 mM LiCl  
67 was used as the solvent at a flow rate of 0.7 ml/min, and the column temperature was maintained  
68 at 40°C. The peak top of the eluted sample was used for molecular mass determination, with a  
69 calibration curve obtained using standard polystyrene kits (PSt Quick E and F; TOSOH, Tokyo,  
70 Japan).

71

72 Supplementary Figure S2. Time-kill test of proanthocyanidin for influenza A virus. A solution  
73 of 100 ppm of proanthocyanidins from *Alpinia zerumbet* (AzPAC) was mixed with or without  
74 influenza A H1N1 virus (A/PR/8/34) for 10–20 min and added to MDCK cells. After incubation  
75 for 4–7 days, a cytopathic effect was observed under an inverted microscope. The 50% endpoint  
76 dilution (TCID<sub>50</sub>/ml) was calculated using the Reed and Muench (1938) method.

77

78 **References**

79 Kubota K, Tsuda S, Tamai A, Meshi T (2003) Tomato mosaic virus replication protein  
80 suppresses virus-targeted posttranscriptional gene silencing. *J Virol* 77: 11016-11026

81 Reed LJ, Muench H (1938) A simple method of estimating fifty percent endpoints. *Am J Hyg* 27:  
82 493-497

83

# Supplementary Figure S1

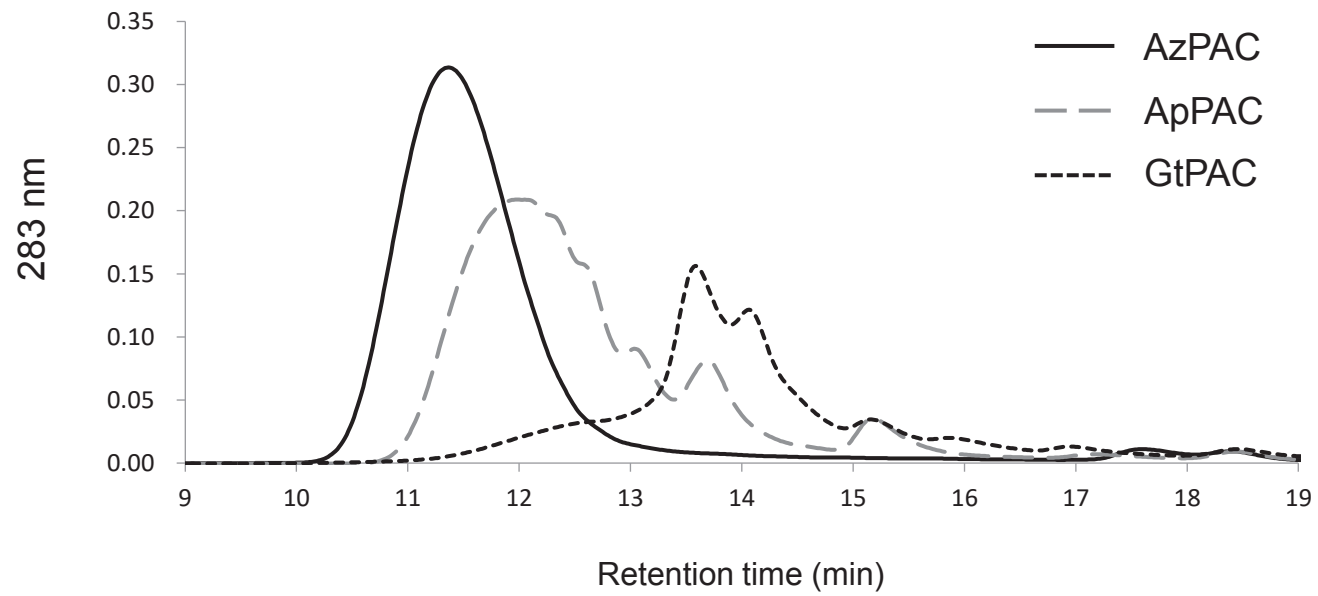

# Supplementary Figure S2

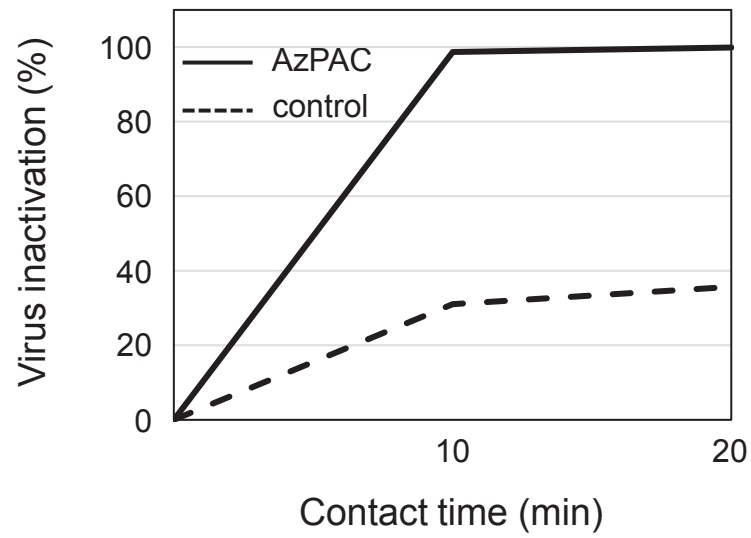

Supplement: plantbiotechnology-38-4-21.0925a-s001.pdf [file plantbiotechnology-38-4-21.0925a-s001.pdf]
